# Supplementary material for: Effects of Water, Sanitation, and Hygiene on the School Absenteeism of Basic Level Students in the Government School of Nepal
Source: Frontiers journal article supplement (doi:10.3389/feduc.2022.869933), 2022-08-04
Supplement: Data_Sheet_1.docx [file Data_Sheet_1.docx]

The JMP (2018) classified with improved and without improved WASH facilities in the schools. The improved water sources include piped water, boreholes or tube wells, protected dug wells, protected springs and packaged or delivered water. Similarly, improved sanitation facilities include flush/pour toilets, ventilated improved pit latrines, composting toilets and pit latrines with a slab or platform. The improved hygiene facility include fixed handwashing facilities or portable including a sink with tap water, buckets with taps, tippy-taps and jugs or basins designed for handwashing. Soap has bar soap, liquid soap, powder detergent and soapy water but does not include ash, soil, sand or other handwashing agents.

On the other hand, unimproved water sources include unprotected wells, unprotected springs and surface water. The unimproved sanitation facility includes pit latrines without a slab or platform, hanging latrines and bucket latrines. Further, the researcher added unimproved sanitation if there were no separate sanitation facilities for the single-sex. Similarly, unimproved hygiene facilities were categorized if handwashing facilities had no soap and no running water at the water point.
